# Supplementary material for: Improving the Varroa (Varroa destructor) Control Strategy by Brood Treatment with Formic Acid—A Pilot Study on Spring Applications
Source: MDPI journal article supplement (doi:10.3390/insects13020149), 2022-01-29
Supplement: s1 [file s1]

**Table S1.** The percentage of infested cells with the varroa mite in the experimental and control groups and different periods, following the brood treatment with formic acid 65% applied by brushing procedure.

| Groups                       | The percentage of infested cells |                 |                   |               |                 |                   |               |                 |                   |
|------------------------------|----------------------------------|-----------------|-------------------|---------------|-----------------|-------------------|---------------|-----------------|-------------------|
|                              | T1                               |                 |                   | T2            |                 |                   | T3 Control    |                 |                   |
| Evaluated colonies & periods | 5-8 July 2021                    | 20-22 July 2021 | 16-18 August 2021 | 5-8 July 2021 | 20-22 July 2021 | 16-18 August 2021 | 5-8 July 2021 | 20-22 July 2021 | 16-18 August 2021 |
| 1                            | 1.75                             | 2.25            | 3.5               | 0.25          | 0               | 1.5               | 9.25          | 4               | 4                 |
| 2                            | 1.25                             | 0.5             | 2.5               | 1.75          | 2.5             | 3.75              | 7.25          | 8               | 15.5              |
| 3                            | 0.25                             | 0.75            | 4.25              | 1             | 0.25            | 2.25              | 2.75          | 5.75            | 7.75              |
| 4                            | 2.5                              | 1.75            | 4.5               | 0.25          | 2.25            | 4.5               | 4.5           | 7.75            | 9.5               |
| 5                            | 1.25                             | 3.75            | 6                 | 1.5           | 1.75            | 4.5               | 11.25         | 9.75            | 15                |
| 6                            | 1.75                             | 1.5             | 3.5               | 0.25          | 2               | 4                 | 7.25          | 10              | 7.75              |
| 7                            | 0.5                              | 1.75            | 3                 | 1             | 1.25            | 3.75              | 7             | 6.75            | 3.5               |
| 8                            | 0.75                             | 1               | 3.25              | 0.5           | 0.25            | 0.75              | 5             | 6.5             | 9.75              |
| 9                            | 1                                | 2               | 5                 | 2             | 2.75            | 4                 | 5.25          | 7.5             | 12.25             |
| 10                           | 3                                | 2.5             | 6.5               | 0.75          | 2.5             | 3.5               | 7.5           | 6.5             | 7.75              |

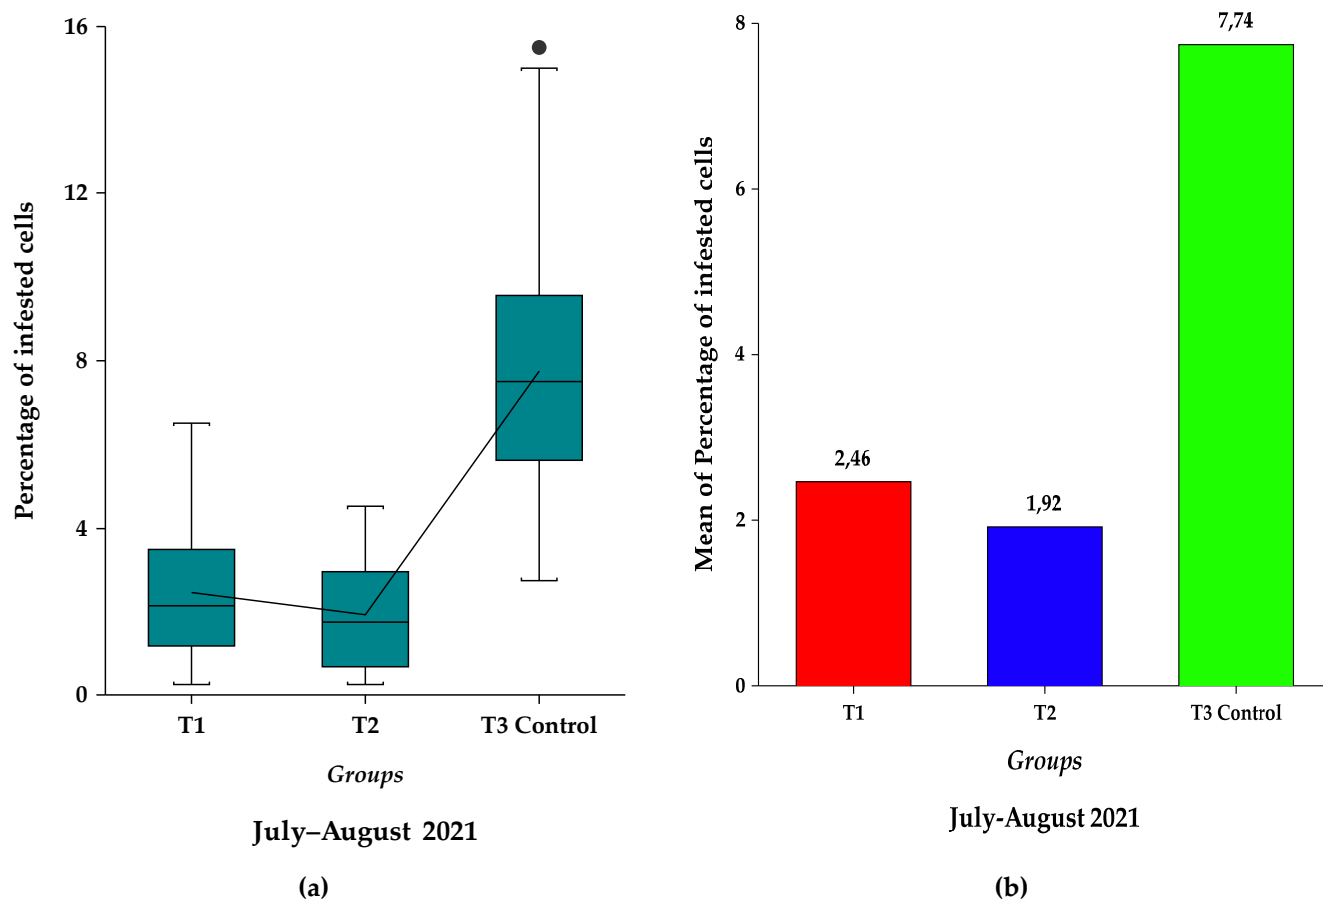

**Figure S1 (a):** A general overview of the box plotted data on the percentage of varroa mite infested cells evaluated in different experimental groups (T1, T2, T3 Control) in the whole evaluation period: July–August 2021. **(b)** The mean percentage of varroa mite infested cells evaluated in different experimental groups (T1, T2, T3 Control) in the whole evaluation period: July–August 2021.
